# Supplementary material for: Displacive disorder and spin frustration hosted multiferroic orders in pyrochlore–spinel composites
Source: Royal Society of Chemistry journal article supplement (doi:10.1039/c6tc02036d), 2016-01-01

**Electronic Supplementary Information (ESI)**

**“Displacive disorder and spin frustration hosted multiferroic orders in pyrochlore - spinel composites”**

**Raja Altaf U Rahman <sup>a</sup>, Peter Schmid-Beurmann <sup>b</sup> and Ramaswamy Murugan\*<sup>a</sup>**

<sup>a</sup>Department of Physics, Pondicherry University, Puducherry 605014, India

<sup>b</sup>Institut für Mineralogie, Westfälische Wilhelms-Universität, Corrensstraße 24, 48149 Münster, Germany

**1. Electron probe microanalysis data from the BNMO sample.**

| <i>Pyrochlore</i> | Ta    | Bi     | Sb    | Nb     | Mn     | O      | Total   | Ta    | Bi    | Sb    | Nb    | Mn    | O     | Total | Faktor |
|-------------------|-------|--------|-------|--------|--------|--------|---------|-------|-------|-------|-------|-------|-------|-------|--------|
| BNMO-Py-1         | 0.089 | 48.503 | 0.002 | 20.087 | 13.557 | 16.652 | 98.89   | 0.003 | 1.393 | 0.000 | 1.297 | 1.481 | 6.245 |       | 6.000  |
| BNMO-Py-2         | 0     | 49.957 | 0     | 21.008 | 12.505 | 17.907 | 101.377 | 0.000 | 1.434 | 0.000 | 1.357 | 1.366 | 6.716 |       | 6.000  |
| BNMO-Py-3         | 0     | 49.523 | 0.021 | 21.216 | 12.537 | 16.728 | 100.025 | 0.000 | 1.422 | 0.001 | 1.370 | 1.369 | 6.273 |       | 6.000  |
| BNMO-Py-4         | 0.033 | 49.604 | 0     | 20.801 | 12.487 | 17.663 | 100.588 | 0.001 | 1.424 | 0.000 | 1.343 | 1.364 | 6.624 |       | 6.000  |
| BNMO-Py-5         | 0     | 49.972 | 0.03  | 20.827 | 12.673 | 17.452 | 100.954 | 0.000 | 1.435 | 0.001 | 1.345 | 1.384 | 6.545 |       | 6.000  |
| BNMO-Py-6         | 0.142 | 49.033 | 0.042 | 21.037 | 12.153 | 16.375 | 98.782  | 0.005 | 1.408 | 0.002 | 1.359 | 1.327 | 6.141 |       | 6.000  |
| BNMO-Py-7         | 0.07  | 48.908 | 0.001 | 21.029 | 12.199 | 17.131 | 99.338  | 0.002 | 1.404 | 0.000 | 1.358 | 1.332 | 6.425 |       | 6.000  |
| BNMO-Py-8         | 0.03  | 48.909 | 0.004 | 20.743 | 12.224 | 15.62  | 97.53   | 0.001 | 1.404 | 0.000 | 1.340 | 1.335 | 5.858 |       | 6.000  |
| BNMO-Py-9         | 0.048 | 50.194 | 0.026 | 21.058 | 12.352 | 17.46  | 101.138 | 0.002 | 1.441 | 0.001 | 1.360 | 1.349 | 6.548 |       | 6.000  |
| BNMO-Py-10        | 0     | 48.869 | 0.017 | 20.614 | 12.363 | 16.546 | 98.409  | 0.000 | 1.403 | 0.001 | 1.331 | 1.350 | 6.205 |       | 6.000  |
| BNMO-Py-11        | 0.027 | 48.893 | 0     | 20.72  | 12.526 | 16.981 | 99.147  | 0.001 | 1.404 | 0.000 | 1.338 | 1.368 | 6.368 |       | 6.000  |
| BNMO-Py-12        | 0     | 49.038 | 0.061 | 20.578 | 12.315 | 17.734 | 99.726  | 0.000 | 1.408 | 0.003 | 1.329 | 1.345 | 6.651 |       | 6.000  |
| BNMO-Py-13        | 0.064 | 48.933 | 0.014 | 20.879 | 12.47  | 17.554 | 99.914  | 0.002 | 1.405 | 0.001 | 1.348 | 1.362 | 6.583 |       | 6.000  |
| BNMO-Py-14        | 0     | 49.263 | 0.038 | 20.593 | 12.587 | 17.177 | 99.658  | 0.000 | 1.414 | 0.002 | 1.330 | 1.375 | 6.442 |       | 6.000  |
| BNMO-Py-15        | 0.008 | 49.502 | 0.042 | 20.927 | 12.228 | 16.781 | 99.488  | 0.000 | 1.421 | 0.002 | 1.351 | 1.335 | 6.293 |       | 6.000  |
| BNMO-Py-16        | 0     | 49.035 | 0.006 | 20.878 | 12.259 | 16.361 | 98.539  | 0.000 | 1.408 | 0.000 | 1.348 | 1.339 | 6.136 |       | 6.000  |



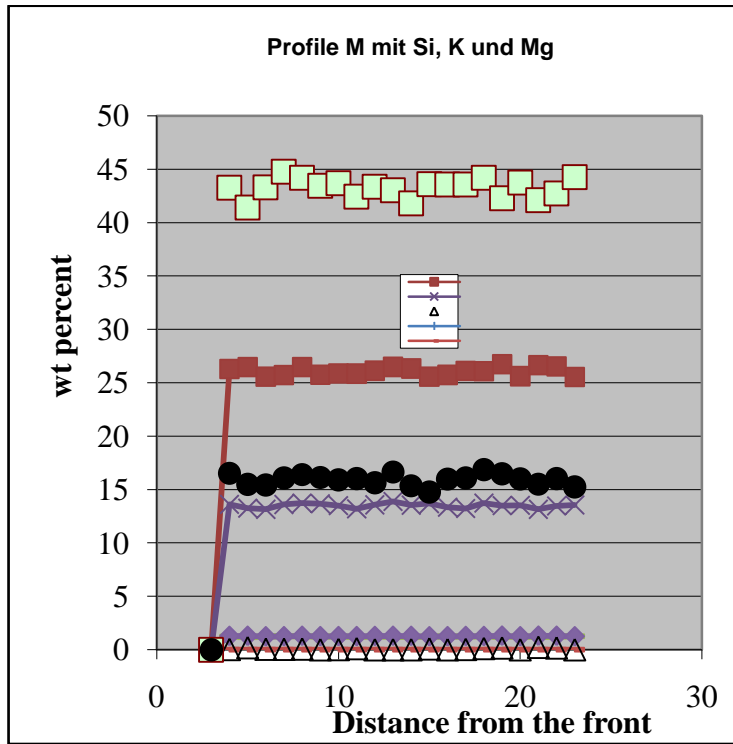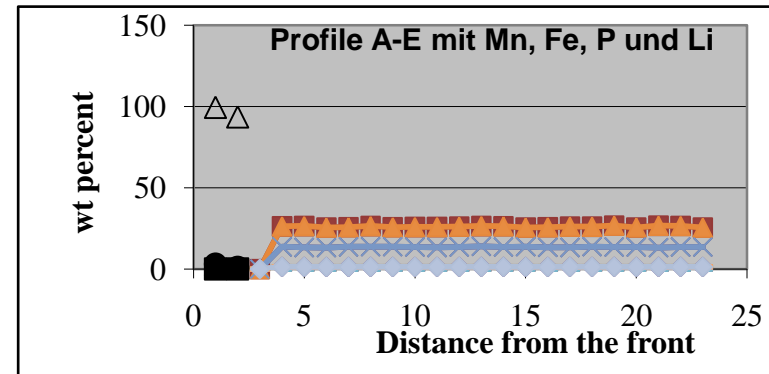

## 2. Electron probe microanalysis data from the BTMO sample.

| <i>Pyrochlore</i> | Ta     | Bi     | Sb    | Nb    | Mn     | O      | Total  | Ta    | Bi    | Sb    | Nb    | Mn    | O     | Total   | Faktor |
|-------------------|--------|--------|-------|-------|--------|--------|--------|-------|-------|-------|-------|-------|-------|---------|--------|
| BTMO-Py-1         | 31.434 | 40.181 | 0     | 0     | 10.781 | 12.343 | 94.739 | 1.042 | 1.154 | 0.000 | 0.000 | 1.177 | 4.629 |         | 6.000  |
| BTMO-Py-2         | 30.927 | 40.552 | 0     | 0.053 | 10.31  | 12.425 | 94.267 | 1.025 | 1.164 | 0.000 | 0.003 | 1.126 | 4.660 |         | 6.000  |
| BTMO-Py-3         | 31.357 | 40.839 | 0.008 | 0.001 | 10.449 | 12.785 | 95.439 | 1.040 | 1.173 | 0.000 | 0.000 | 1.141 | 4.795 |         | 6.000  |
| BTMO-Py-4         | 32.055 | 41.601 | 0     | 0.027 | 10.59  | 13.305 | 97.578 | 1.063 | 1.194 | 0.000 | 0.002 | 1.157 | 4.990 |         | 6.000  |
| BTMO-Py-5         | 31.427 | 42.158 | 0.072 | 0.043 | 10.684 | 13.102 | 97.486 | 1.042 | 1.210 | 0.004 | 0.003 | 1.167 | 4.914 |         | 6.000  |
| BTMO-Py-6         | 31.124 | 41.246 | 0     | 0     | 10.572 | 13.002 | 95.944 | 1.032 | 1.184 | 0.000 | 0.000 | 1.155 | 4.876 |         | 6.000  |
| BTMO-Py-7         | 31.041 | 41.237 | 0     | 0.049 | 10.717 | 13.02  | 96.064 | 1.029 | 1.184 | 0.000 | 0.003 | 1.170 | 4.883 |         | 6.000  |
| BTMO-Py-8         | 31.404 | 40.926 | 0.009 | 0.082 | 10.292 | 11.902 | 94.615 | 1.041 | 1.175 | 0.000 | 0.005 | 1.124 | 4.464 |         | 6.000  |
| BTMO-Py-9         | 32.279 | 41.712 | 0.045 | 0.034 | 10.249 | 12.616 | 96.935 | 1.070 | 1.198 | 0.002 | 0.002 | 1.119 | 4.731 |         | 6.000  |
| BTMO-Py-10        | 31.995 | 41.534 | 0.044 | 0     | 10.394 | 13.22  | 97.187 | 1.061 | 1.192 | 0.002 | 0.000 | 1.135 | 4.958 |         | 6.000  |
| BTMO-Py-11        | 30.854 | 41.555 | 0.008 | 0.087 | 10.336 | 12.926 | 95.766 | 1.023 | 1.193 | 0.000 | 0.006 | 1.129 | 4.848 |         | 6.000  |
| BTMO-Py-12        | 30.47  | 41.685 | 0     | 0     | 10.368 | 12.153 | 94.676 | 1.010 | 1.197 | 0.000 | 0.000 | 1.132 | 4.558 |         | 6.000  |
| BTMO-Py-13        | 32.131 | 40.932 | 0.063 | 0.014 | 10.492 | 12.536 | 96.168 | 1.065 | 1.175 | 0.003 | 0.001 | 1.146 | 4.701 |         | 6.000  |
| BTMO-Py-14        | 31.433 | 40.863 | 0.019 | 0.017 | 10.56  | 12.654 | 95.546 | 1.042 | 1.173 | 0.001 | 0.001 | 1.153 | 4.746 |         | 6.000  |
| BTMO-Py-15        | 31.689 | 41.616 | 0.001 | 0     | 10.492 | 13.614 | 97.412 | 1.051 | 1.195 | 0.000 | 0.000 | 1.146 | 5.106 |         | 6.000  |
| BTMO-Py-16        | 31.887 | 41.258 | 0.015 | 0     | 10.221 | 12.753 | 96.134 | 1.057 | 1.185 | 0.001 | 0.000 | 1.116 | 4.783 |         | 6.000  |
| BTMO-Py-17        | 31.505 | 41.633 | 0.032 | 0.066 | 10.489 | 12.795 | 96.52  | 1.045 | 1.195 | 0.002 | 0.004 | 1.146 | 4.798 |         | 6.000  |
| BTMO-Py-18        | 31.827 | 42.082 | 0.022 | 0.055 | 10.469 | 13.346 | 97.801 | 1.055 | 1.208 | 0.001 | 0.004 | 1.143 | 5.005 |         | 6.000  |
| BTMO-Py-19        | 31.023 | 40.752 | 0.045 | 0.007 | 10.573 | 14.448 | 96.848 | 1.029 | 1.170 | 0.002 | 0.000 | 1.155 | 5.418 |         | 6.000  |
| BTMO-Py-20        | 30.573 | 41.998 | 0     | 0     | 10.218 | 12.471 | 95.26  | 1.014 | 1.206 | 0.000 | 0.000 | 1.116 | 4.677 |         | 6.000  |
|                   | 31.422 | 41.318 | 0.019 | 0.027 | 10.463 | 12.871 | 96.119 | 1.042 | 1.186 | 0.001 | 0.002 | 1.143 | 4.827 | #DIV/0! |        |
|                   | 0.514  | 0.531  | 0.023 | 0.030 | 0.164  | 0.563  | 1.085  | 0.017 | 0.015 | 0.001 | 0.002 | 0.018 | 0.211 | #DIV/0! |        |

|                 | A-<br>Position |              | B-<br>Position |              |                    |
|-----------------|----------------|--------------|----------------|--------------|--------------------|
| <b>Formula</b>  | <b>Bi</b>      | <b>Mn</b>    | <b>Ta</b>      | <b>Mn</b>    | <b>O</b>           |
|                 | <b>1.186</b>   | <b>0.571</b> | <b>1.042</b>   | <b>0.571</b> | <b>4.827</b>       |
| <b>Valences</b> | <b>A =</b>     | <b>1.758</b> | <b>B =</b>     | <b>1.61</b>  |                    |
| <b>Summe</b>    | <b>11.05</b>   | <b>1.14</b>  | <b>5.21</b>    | <b>1.14</b>  | <b>-9.65</b>       |
| <b>Formula</b>  | <b>Mn</b>      | <b>Bi</b>    | <b>Ta</b>      | <b>O</b>     | <b>Faktor</b>      |
|                 | <b>1.039</b>   | <b>1.078</b> | <b>0.947</b>   | <b>4.39</b>  | <b>0.909090909</b> |

| <i>Hausmannite</i> | Ta    | Bi    | Sb    | Nb    | Mn     | O      | Total   | ok | Ta    | Bi    | Sb    | Nb    | Mn    | O     | Total   |       |
|--------------------|-------|-------|-------|-------|--------|--------|---------|----|-------|-------|-------|-------|-------|-------|---------|-------|
| BTMO-Ha-1          | 0     | 0.501 | 0.002 | 0.119 | 72.504 | 28.497 | 101.623 |    | 0.000 | 0.005 | 0.000 | 0.003 | 2.952 | 3.985 |         | 2.237 |
| BTMO-Ha-2          | 0.067 | 0.077 | 0     | 0.071 | 72.447 | 28.546 | 101.208 |    | 0.001 | 0.001 | 0.000 | 0.002 | 2.950 | 3.992 |         | 2.237 |
| BTMO-Ha-3          | 0     | 0     | 0     | 0.094 | 72.429 | 27.756 | 100.279 |    | 0.000 | 0.000 | 0.000 | 0.002 | 2.949 | 3.881 |         | 2.237 |
|                    | 0.02  | 0.19  | 0.00  | 0.09  | 72.46  | 28.27  | 101.04  |    | 0.00  | 0.00  | 0.00  | 0.00  | 2.95  | 3.95  | #DIV/0! |       |
|                    | 0.04  | 0.27  | 0.00  | 0.02  | 0.04   | 0.44   | 0.69    |    | 0.00  | 0.00  | 0.00  | 0.00  | 0.00  | 0.06  | #DIV/0! |       |

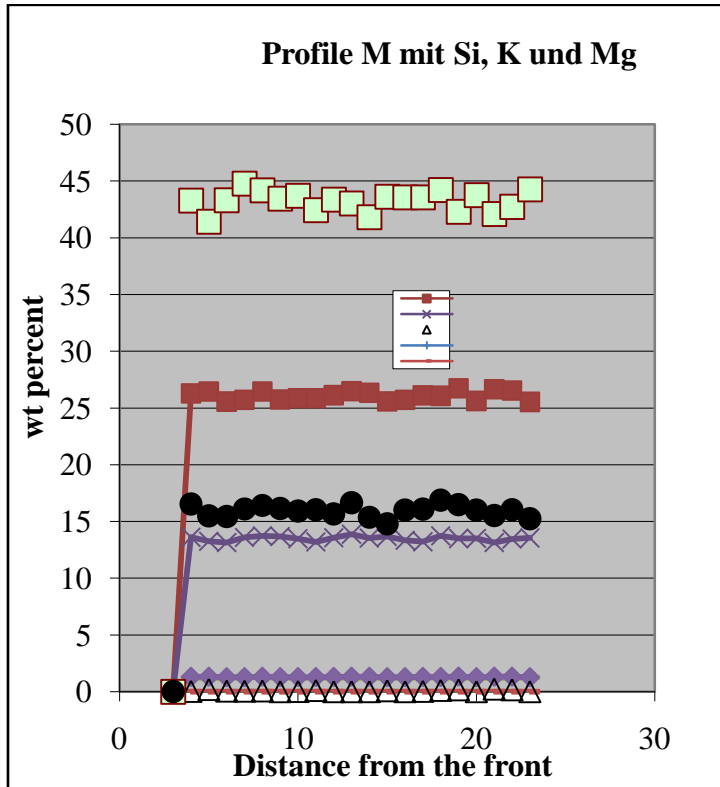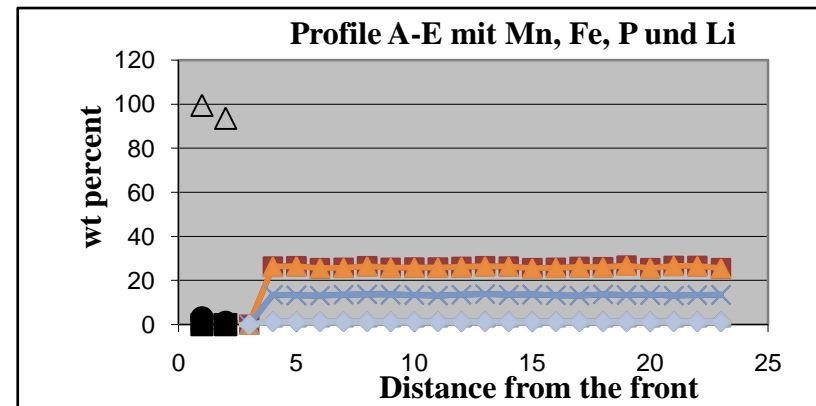

### 3. Electron probe microanalysis data from the BSMO sample.

| <i>Pyrochlore</i> | Ta    | Bi     | Sb     | Nb    | Mn     | O      | Total   | Ta    | Bi    | Sb    | Nb    | Mn    | O     | Total   | Faktor |
|-------------------|-------|--------|--------|-------|--------|--------|---------|-------|-------|-------|-------|-------|-------|---------|--------|
| BSMO-Py-1         | 0     | 43.289 | 26.28  | 0.028 | 13.621 | 16.534 | 99.752  | 0.000 | 1.243 | 1.295 | 0.002 | 1.488 | 6.201 |         | 6.000  |
| BSMO-Py-2         | 0.164 | 41.417 | 26.461 | 0.194 | 13.266 | 15.492 | 96.994  | 0.005 | 1.189 | 1.304 | 0.013 | 1.449 | 5.810 |         | 6.000  |
| BSMO-Py-3         | 0     | 43.31  | 25.565 | 0.053 | 13.159 | 15.428 | 97.515  | 0.000 | 1.243 | 1.260 | 0.003 | 1.437 | 5.786 |         | 6.000  |
| BSMO-Py-4         | 0.07  | 44.773 | 25.716 | 0.047 | 13.602 | 16.103 | 100.311 | 0.002 | 1.285 | 1.267 | 0.003 | 1.486 | 6.039 |         | 6.000  |
| BSMO-Py-5         | 0.09  | 44.194 | 26.461 | 0.066 | 13.739 | 16.414 | 100.964 | 0.003 | 1.269 | 1.304 | 0.004 | 1.500 | 6.156 |         | 6.000  |
| BSMO-Py-6         | 0.136 | 43.44  | 25.752 | 0     | 13.687 | 16.139 | 99.154  | 0.005 | 1.247 | 1.269 | 0.000 | 1.495 | 6.053 |         | 6.000  |
| BSMO-Py-7         | 0.01  | 43.697 | 25.865 | 0.02  | 13.496 | 15.91  | 98.998  | 0.000 | 1.255 | 1.275 | 0.001 | 1.474 | 5.967 |         | 6.000  |
| BSMO-Py-8         | 0.121 | 42.431 | 25.857 | 0.108 | 13.204 | 16.026 | 97.747  | 0.004 | 1.218 | 1.274 | 0.007 | 1.442 | 6.010 |         | 6.000  |
| BSMO-Py-9         | 0.028 | 43.352 | 26.127 | 0     | 13.58  | 15.653 | 98.74   | 0.001 | 1.245 | 1.288 | 0.000 | 1.483 | 5.870 |         | 6.000  |
| BSMO-Py-10        | 0.024 | 43.03  | 26.485 | 0     | 13.883 | 16.653 | 100.075 | 0.001 | 1.235 | 1.305 | 0.000 | 1.516 | 6.245 |         | 6.000  |
| BSMO-Py-11        | 0     | 41.811 | 26.336 | 0.003 | 13.55  | 15.361 | 97.061  | 0.000 | 1.200 | 1.298 | 0.000 | 1.480 | 5.761 |         | 6.000  |
| BSMO-Py-12        | 0.023 | 43.611 | 25.578 | 0.082 | 13.693 | 14.784 | 97.771  | 0.001 | 1.252 | 1.261 | 0.005 | 1.495 | 5.544 |         | 6.000  |
| BSMO-Py-13        | 0.03  | 43.573 | 25.729 | 0     | 13.355 | 15.995 | 98.682  | 0.001 | 1.251 | 1.268 | 0.000 | 1.459 | 5.998 |         | 6.000  |
| BSMO-Py-14        | 0.201 | 43.565 | 26.11  | 0.032 | 13.223 | 16.094 | 99.225  | 0.007 | 1.251 | 1.287 | 0.002 | 1.444 | 6.036 |         | 6.000  |
| BSMO-Py-15        | 0     | 44.213 | 26.072 | 0.116 | 13.747 | 16.88  | 101.028 | 0.000 | 1.269 | 1.285 | 0.007 | 1.501 | 6.330 |         | 6.000  |
| BSMO-Py-16        | 0.091 | 42.296 | 26.732 | 0.166 | 13.507 | 16.485 | 99.277  | 0.003 | 1.214 | 1.317 | 0.011 | 1.475 | 6.182 |         | 6.000  |
| BSMO-Py-17        | 0.052 | 43.765 | 25.619 | 0     | 13.529 | 16.005 | 98.97   | 0.002 | 1.257 | 1.263 | 0.000 | 1.478 | 6.002 |         | 6.000  |
| BSMO-Py-18        | 0.191 | 42.105 | 26.657 | 0.229 | 13.157 | 15.512 | 97.851  | 0.006 | 1.209 | 1.314 | 0.015 | 1.437 | 5.817 |         | 6.000  |
| BSMO-Py-19        | 0.072 | 42.729 | 26.535 | 0.169 | 13.471 | 16.036 | 99.012  | 0.002 | 1.227 | 1.308 | 0.011 | 1.471 | 6.014 |         | 6.000  |
| BSMO-Py-20        | 0.182 | 44.275 | 25.541 | 0     | 13.565 | 15.247 | 98.81   | 0.006 | 1.271 | 1.259 | 0.000 | 1.481 | 5.718 |         | 6.000  |
|                   | 0.074 | 43.244 | 26.074 | 0.066 | 13.502 | 15.938 | 98.897  | 0.002 | 1.242 | 1.285 | 0.004 | 1.475 | 5.977 | #DIV/0! |        |
|                   | 0.070 | 0.879  | 0.398  | 0.074 | 0.212  | 0.526  | 1.169   | 0.002 | 0.025 | 0.020 | 0.005 | 0.023 | 0.197 | #DIV/0! |        |

|          | A-Position |       | B-Position |       |             |
|----------|------------|-------|------------|-------|-------------|
| Formula  | Bi         | Mn    | Sb         | Mn    | O           |
|          | 1.242      | 0.737 | 1.285      | 0.737 | 5.977       |
| Valences | A = 3.72   | 1.979 | B = 1.47   | 6.42  | 1.47        |
| Summe    | 13.10      |       |            |       | 11.95       |
| Formula  | Mn         | Bi    | Sb         | O     | Faktor      |
|          | 1.170      | 0.985 | 1.020      | 4.74  | 0.793650794 |

| <b>Bi2O3</b>       | Ta   | Bi     | Sb     | Nb    | Mn     | O      | Total   | Ta    | Bi    | Sb    | Nb    | Mn    | O     | Total   |       |
|--------------------|------|--------|--------|-------|--------|--------|---------|-------|-------|-------|-------|-------|-------|---------|-------|
| BSMO-Bi-1          | 0    | 58.653 | 15.773 | 0.123 | 10.078 | 14.806 | 99.433  | 0.000 | 0.842 | 0.389 | 0.004 | 0.550 | 2.776 |         | 3.000 |
| BSMO-Bi-2          | 0    | 81.582 | 0.737  | 0.016 | 0.686  | 10.564 | 93.585  | 0.000 | 0.390 | 0.006 | 0.000 | 0.012 | 0.660 |         | 1.000 |
|                    | 0.00 | 70.12  | 8.26   | 0.07  | 5.38   | 12.69  | 96.51   | 0.00  | 0.62  | 0.20  | 0.00  | 0.28  | 1.72  | #DIV/0! |       |
|                    | 0.00 | 16.21  | 10.63  | 0.08  | 6.64   | 3.00   | 4.14    | 0.00  | 0.32  | 0.27  | 0.00  | 0.38  | 1.50  | #DIV/0! |       |
| <b>Bi-Mn-Oxide</b> | Ta   | Bi     | Sb     | Nb    | Mn     | O      | Total   | Ta    | Bi    | Sb    | Nb    | Mn    | O     | Total   |       |
| BSMO-BiMn-1        | 0    | 27.209 | 7.143  | 0.066 | 40.261 | 25.16  | 99.839  | 0.000 | 0.130 | 0.059 | 0.001 | 0.733 | 1.573 |         | 1.000 |
| BSMO-BiMn-2        | 0    | 23.856 | 3.187  | 0.11  | 44.385 | 26.292 | 97.83   | 0.000 | 0.114 | 0.026 | 0.001 | 0.808 | 1.643 |         | 1.000 |
| BSMO-BiMn-3        | 0    | 27.92  | 7.91   | 0.078 | 38.789 | 24.88  | 99.577  | 0.000 | 0.134 | 0.065 | 0.001 | 0.706 | 1.555 |         | 1.000 |
|                    | 0.00 | 26.33  | 6.08   | 0.08  | 41.15  | 25.44  | 99.08   | 0.00  | 0.12  | 0.05  | 0.00  | 0.76  | 1.60  | #DIV/0! |       |
|                    | 0.00 | 2.17   | 2.53   | 0.02  | 2.90   | 0.75   | 1.09    | 0.00  | 0.01  | 0.03  | 0.00  | 0.07  | 0.06  | #DIV/0! |       |
| <b>Hausmannite</b> | Ta   | Bi     | Sb     | Nb    | Mn     | O      | Total   | Ta    | Bi    | Sb    | Nb    | Mn    | O     | Total   |       |
| BSMO-Ha-1          | 0    | 0.232  | 0.52   | 0.083 | 71.209 | 28.61  | 100.654 | 0.000 | 0.002 | 0.010 | 0.002 | 2.900 | 4.001 |         | 2.237 |
| BSMO-Ha-2          | 0    | 0.166  | 0.602  | 0.074 | 71.61  | 28.57  | 101.022 | 0.000 | 0.002 | 0.011 | 0.002 | 2.916 | 3.995 |         | 2.237 |
|                    | 0.00 | 0.20   | 0.56   | 0.08  | 71.41  | 28.59  | 100.84  | 0.00  | 0.00  | 0.01  | 0.00  | 2.91  | 4.00  | #DIV/0! |       |
|                    | 0.00 | 0.05   | 0.06   | 0.01  | 0.28   | 0.03   | 0.26    | 0.00  | 0.00  | 0.00  | 0.00  | 0.01  | 0.00  | #DIV/0! |       |



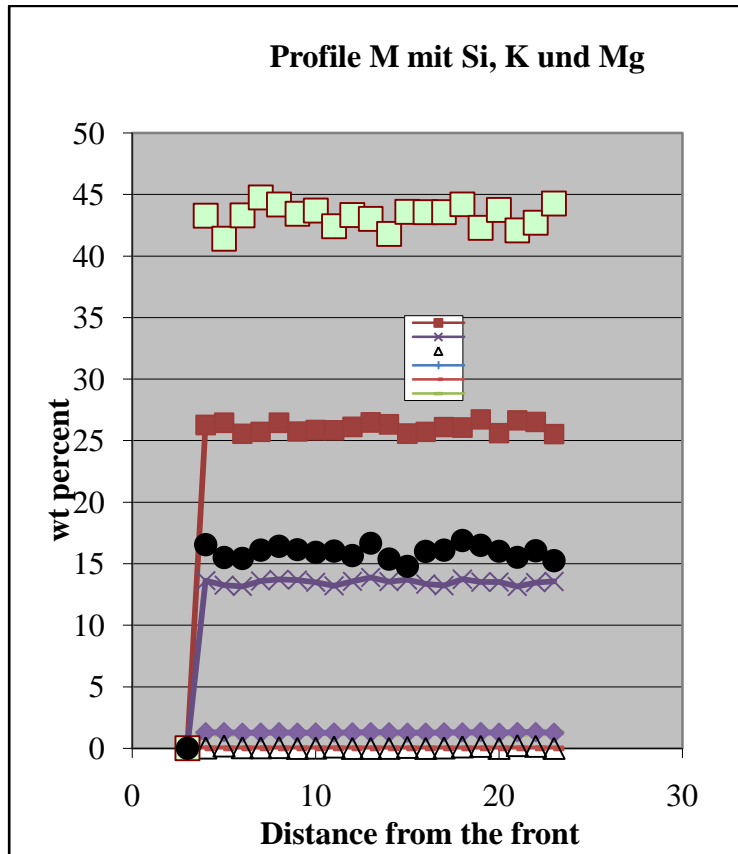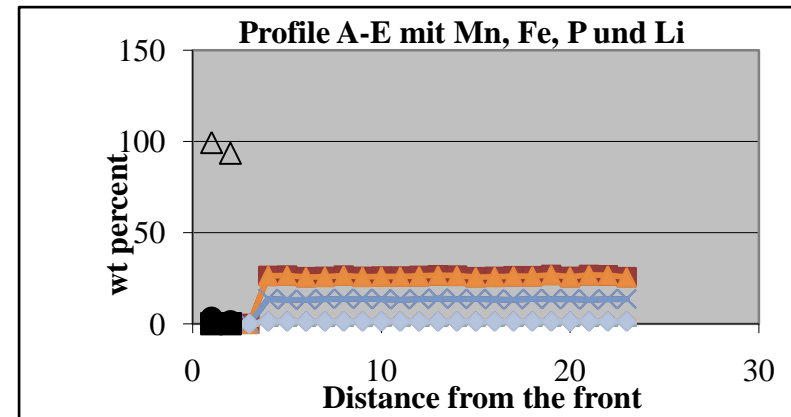

Supplement: c6tc02036d1.pdf [file c6tc02036d1.pdf]
